# Supplementary material for: Fractional Flow Reserve in Acute Myocardial Infarction: A Guide for Non-Culprit Lesions?
Source: Springer Nature journal article supplement (doi:10.1007/s40119-015-0040-4), 2015-06-01
Supplement: MOESM1 [file 9339406]

- In patients with ST-segment elevation myocardial infarction (STEMI) and multi-vessel disease (MVD) the optimal therapy for non-culprit lesions is still a matter of debate.
- The severity of MVD can be overestimated by angiography during primary percutaneous coronary intervention as shown by fractional flow reserve (FFR) measurements in stable patients.
- FFR is probably also a valuable guide for non-culprit lesions in acute myocardial infarction. So far, however, only the reliability and safety of FFR measurements in myocardial infarction has been established.
- The clinical implications of an FFR-guided treatment strategy in STEMI patients with MVD are currently under investigation.

This summary slide represents the opinions of the authors. For a full list of acknowledgments and conflicts of interest for all authors of this article, please see the full text online. Copyright © The Authors 2015. Creative Commons Attribution Noncommercial License (CC BY-NC).
